# Supplementary material for: Fabrication of black TiO2 through microwave heating for visible light-driven photocatalytic degradation of rhodamine 6G
Source: Royal Society of Chemistry journal article supplement (doi:10.1039/d4re00202d), 2024-01-01
Supplement: d4re00202d1.pdf [file d4re00202d1.pdf]

Electronic Supplementary Information

## **Fabrication of Black TiO<sub>2</sub> Through Microwave Heating for Visible Light-driven Photocatalytic Degradation of Rhodamine 6G**

Riska Rachmantyo,<sup>‡ab</sup> Afif Akmal Afkauni,<sup>‡c</sup> Ricky Reinaldo,<sup>a</sup> Lei Zhang,<sup>d</sup> Arramel Arramel,<sup>c</sup>  
Muhammad Danang Birowosuto,<sup>e</sup> Arie Wibowo<sup>\*af</sup> and Hermawan Judawisastra<sup>\*a</sup>

<sup>a</sup>Materials Science and Engineering Research Group, Faculty of Mechanical and Aerospace Engineering, Institut Teknologi Bandung, Jl. Ganesha 10, Bandung 40132, West Java, Indonesia.

<sup>b</sup>Doctoral Program of Materials Science and Engineering, Faculty of Mechanical and Aerospace Engineering, Institut Teknologi Bandung, Jl. Ganesha 10, Bandung 40132, West Java, Indonesia.

<sup>c</sup>Nano Center Indonesia, Jalan Raya PUSPITEK, South Tangerang, Banten 15314, Indonesia.

<sup>d</sup>Department of Physics, National University of Singapore, Singapore 117551, Singapore.

<sup>e</sup>Łukasiewicz Research Network—PORT Polish Center for Technology Development, Stabłowicka 147, 54-066, Wrocław, Poland.

<sup>f</sup>Research Center for Nanoscience and Nanotechnology, Institut Teknologi Bandung, Ganesha 10, Bandung 40132, West Java, Indonesia.

‡ These authors contributed equally.

\*Corresponding authors: [hermawan.judawisastra@itb.ac.id](mailto:hermawan.judawisastra@itb.ac.id) ; [ariewibowo@itb.ac.id](mailto:ariewibowo@itb.ac.id)

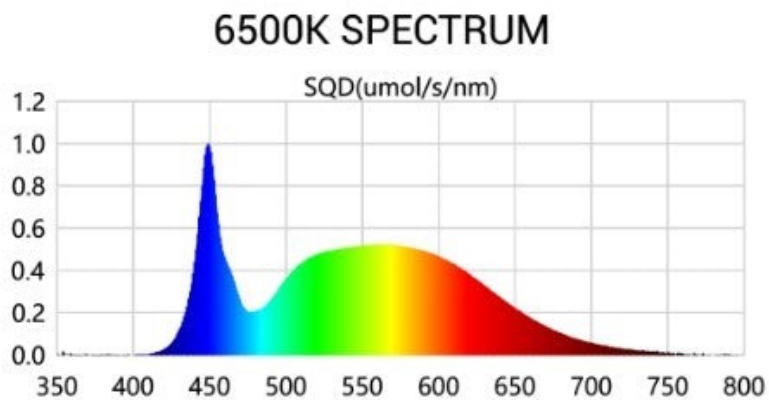

**Fig. S1** LED light spectrum with 6500K colour<sup>1</sup>.

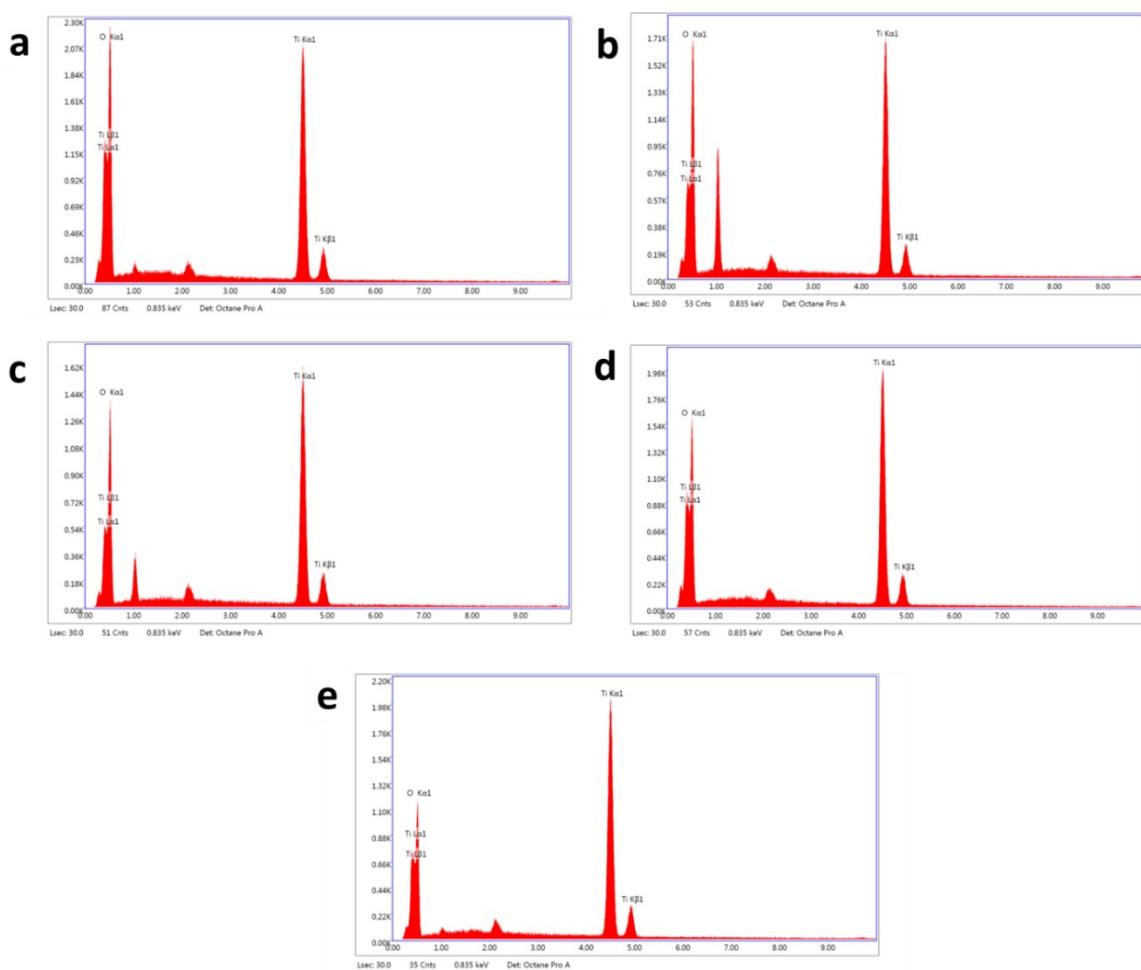

**Fig. S2** EDS spectra of (a) P25, (b) T-20, (c) T-30, (d) T-40 and (e) T-50 samples.

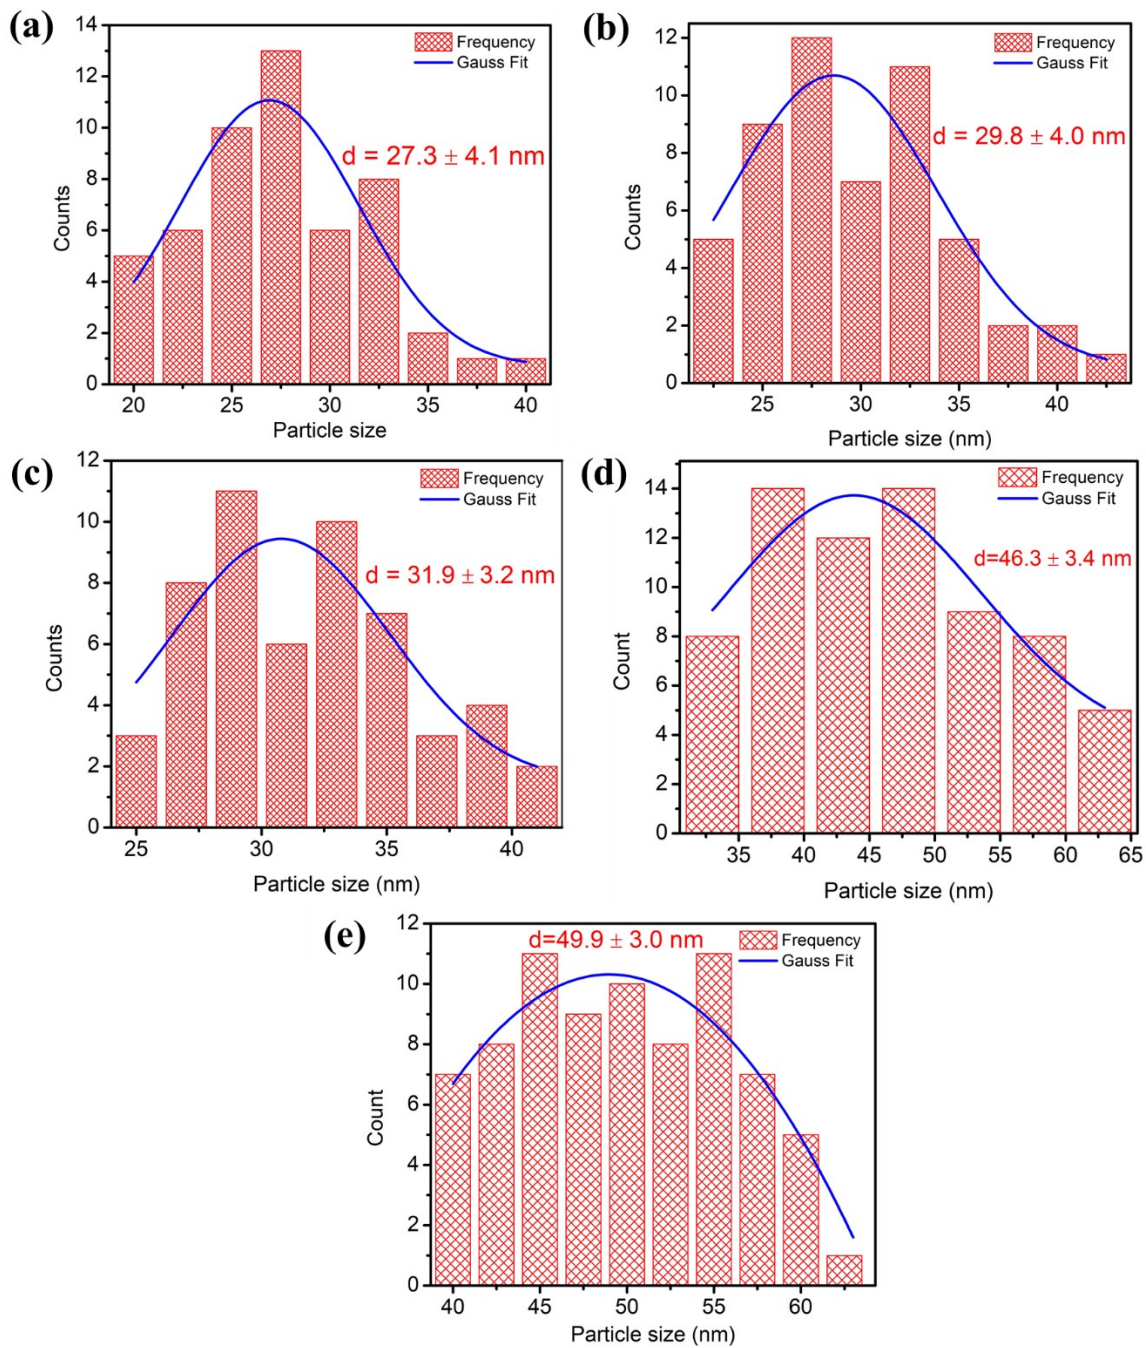

**Fig. S3** Particle size distribution based on SEM images of (a) P25, (b) T-20, (c) T-30, (d) T-40 and (e) T-50 samples.

## References

- 1 6500K vs 2700K; what does the Kelvin number actually mean? - The 2Hr Aquarist, <https://www.2hraquarist.com/blogs/light-3pillars/k-rating>, (accessed 16 July 2024)
